# Supplementary material
Source: MDPI journal article supplement (https://www.mdpi.com/2073-4433/13/7/1153)
Supplement: s1 [file s1]

# Evaluating Gas Emissions from Different Feed Cropping Systems in the North China Plain: a Two-Year Field Measurement

Wenhua Liao, Chunjing Liu, Xinxing Zhang, Shanshan Wang, Yujing Fan and Zhiling Gao

**Table S1.** DM productions and the PFP<sub>DM</sub> (mean  $\pm$  standard deviation) of different rotation systems during the experimental period.

| Rotations | Type of Crops   | Individual crop (kg ha <sup>-1</sup> season <sup>-1</sup> ) |                  | Total (kg ha <sup>-1</sup> yr <sup>-1</sup> ) |                     |
|-----------|-----------------|-------------------------------------------------------------|------------------|-----------------------------------------------|---------------------|
|           |                 | 2015-2016                                                   | 2016-2017        | 2015-2016                                     | 2016-2017           |
| WW-SuM    | Winter wheat    | 15298 $\pm$ 960                                             | 15296 $\pm$ 960  | 27125 $\pm$ 905 b                             | 31731 $\pm$ 1630 b  |
|           | Summer maize    | 11827 $\pm$ 1207                                            | 16435 $\pm$ 1158 |                                               |                     |
| Tr-SuM    | Triticale       | 8132 $\pm$ 156                                              | 8252 $\pm$ 103   | 20178 $\pm$ 3235 c                            | 25667 $\pm$ 2573 c  |
|           | Summer maize    | 12046 $\pm$ 3143                                            | 17415 $\pm$ 2514 |                                               |                     |
| Tr-SpM    | Triticale       | 3912 $\pm$ 357                                              | 5620 $\pm$ 276   | 19643 $\pm$ 1845 c                            | 20845 $\pm$ 402 d   |
|           | Spring maize    | 15731 $\pm$ 1686                                            | 15225 $\pm$ 143  |                                               |                     |
| Tr-DFM    | Triticale       | 4062 $\pm$ 195                                              | 8948 $\pm$ 204   | 31012 $\pm$ 777 a                             | 35628 $\pm$ 1443 a  |
|           | Forage maize #1 | 13877 $\pm$ 853                                             | 18825 $\pm$ 1134 |                                               |                     |
|           | Forage maize #2 | 13073 $\pm$ 95                                              | 7855 $\pm$ 335   |                                               |                     |
| DFM       | Forage maize #1 | 12556 $\pm$ 1671                                            | 16672 $\pm$ 393  | 20452 $\pm$ 1788 c                            | 23032 $\pm$ 2336 cd |
|           | Forage maize #2 | 7896 $\pm$ 1161                                             | 6360 $\pm$ 1949  |                                               |                     |

WW, winter wheat; Tr, triticale; SuM, summer maize; SpM, spring maize; DFM, double maize cropping system. Different letters in one column indicate significant difference ( $P < 0.05$ ).

**Table S2.** CP productions and the PFP<sub>CP</sub> (mean  $\pm$  standard deviation) of different rotation systems during experimental period.

| Rotations | Type of Crops   | Individual crop (kg ha <sup>-1</sup> season <sup>-1</sup> ) |                | Total (kg ha <sup>-1</sup> season <sup>-1</sup> ) |                   |
|-----------|-----------------|-------------------------------------------------------------|----------------|---------------------------------------------------|-------------------|
|           |                 | 2015-2016                                                   | 2016-2017      | 2015-2016                                         | 2016-2017         |
| WW-SuM    | Winter wheat    | 1165 $\pm$ 134                                              | 1030 $\pm$ 54  | 2338 $\pm$ 76 a                                   | 2265 $\pm$ 119 b  |
|           | Summer maize    | 1173 $\pm$ 124                                              | 1235 $\pm$ 65  |                                                   |                   |
| Tr-SuM    | Triticale       | 546 $\pm$ 7                                                 | 413 $\pm$ 21   | 1800 $\pm$ 305 b                                  | 1923 $\pm$ 160 c  |
|           | Summer maize    | 1254 $\pm$ 298                                              | 1510 $\pm$ 175 |                                                   |                   |
| Tr-SpM    | Triticale       | 361 $\pm$ 20                                                | 333 $\pm$ 29   | 2158 $\pm$ 255 ab                                 | 2159 $\pm$ 195 bc |
|           | Spring maize    | 1797 $\pm$ 237                                              | 1826 $\pm$ 171 |                                                   |                   |
| Tr-DFM    | Triticale       | 367 $\pm$ 7                                                 | 415 $\pm$ 11   | 2529 $\pm$ 189 a                                  | 2629 $\pm$ 80 a   |
|           | Forage maize #1 | 1414 $\pm$ 190                                              | 1500 $\pm$ 45  |                                                   |                   |
|           | Forage maize #2 | 748 $\pm$ 8                                                 | 714 $\pm$ 25   |                                                   |                   |
| DFM       | Forage maize #1 | 1342 $\pm$ 125                                              | 1480 $\pm$ 132 | 1713 $\pm$ 114 b                                  | 1718 $\pm$ 104 c  |
|           | Forage maize #2 | 371 $\pm$ 14                                                | 310 $\pm$ 10   |                                                   |                   |

WW, winter wheat; Tr, triticale; SuM, summer maize; SpM, spring maize; DFM, double maize cropping system. Different letters in one column indicate significant difference ( $P < 0.05$ ).

**Table S3.** GHG emissions (mean  $\pm$  standard deviation) of N<sub>2</sub>O, CH<sub>4</sub>, and indirect N<sub>2</sub>O from the deposition of emitted NH<sub>3</sub> of different rotation systems during the experimental period.

| Rotations | GHG_N <sub>2</sub> O<br>(kg ha <sup>-1</sup> yr <sup>-1</sup> ) | GHG_CH <sub>4</sub><br>(kg ha <sup>-1</sup> yr <sup>-1</sup> ) | GHG direct<br>(kg ha <sup>-1</sup> yr <sup>-1</sup> ) | GHG_NH <sub>3</sub><br>(kg ha <sup>-1</sup> yr <sup>-1</sup> ) | Total GHG<br>(kg ha <sup>-1</sup> yr <sup>-1</sup> ) |
|-----------|-----------------------------------------------------------------|----------------------------------------------------------------|-------------------------------------------------------|----------------------------------------------------------------|------------------------------------------------------|
| WW-SuM    | 1579 $\pm$ 47.7 b                                               | -58.8 $\pm$ 11.8 a                                             | 1521 $\pm$ 59 b                                       | 52.95 $\pm$ 4.5 a                                              | 1574 $\pm$ 64 b                                      |
| Tr-SuM    | 1500 $\pm$ 63.6 b                                               | -70 $\pm$ 10.6 a                                               | 1430 $\pm$ 74 b                                       | 50.27 $\pm$ 6.5 a                                              | 1480 $\pm$ 81 b                                      |
| Tr-SpM    | 1407 $\pm$ 164.3 b                                              | -58.8 $\pm$ 16.5 a                                             | 1348 $\pm$ 181 b                                      | 51.22 $\pm$ 10.2 a                                             | 1400 $\pm$ 191 b                                     |
| Tr-DFM    | 1900 $\pm$ 259.7 a                                              | -79.8 $\pm$ 14.3 a                                             | 1820 $\pm$ 274 a                                      | 62.99 $\pm$ 7.1 a                                              | 1883 $\pm$ 281 a                                     |
| DFM       | 1428 $\pm$ 92.8 b                                               | -64.68 $\pm$ 16.8 a                                            | 1364 $\pm$ 110 b                                      | 35.59 $\pm$ 4.9 b                                              | 1399 $\pm$ 114 b                                     |

GHG, greenhouse gas in terms of CO<sub>2</sub>-equivalent; WW, winter wheat; Tr, triticale; SuM, summer maize; SpM, spring maize; DFM, double maize cropping system. Different letters in one column indicate significant difference (P<0.05).
